# Supplementary material
Source: PubMed Central journal article supplement (PMC5079470)

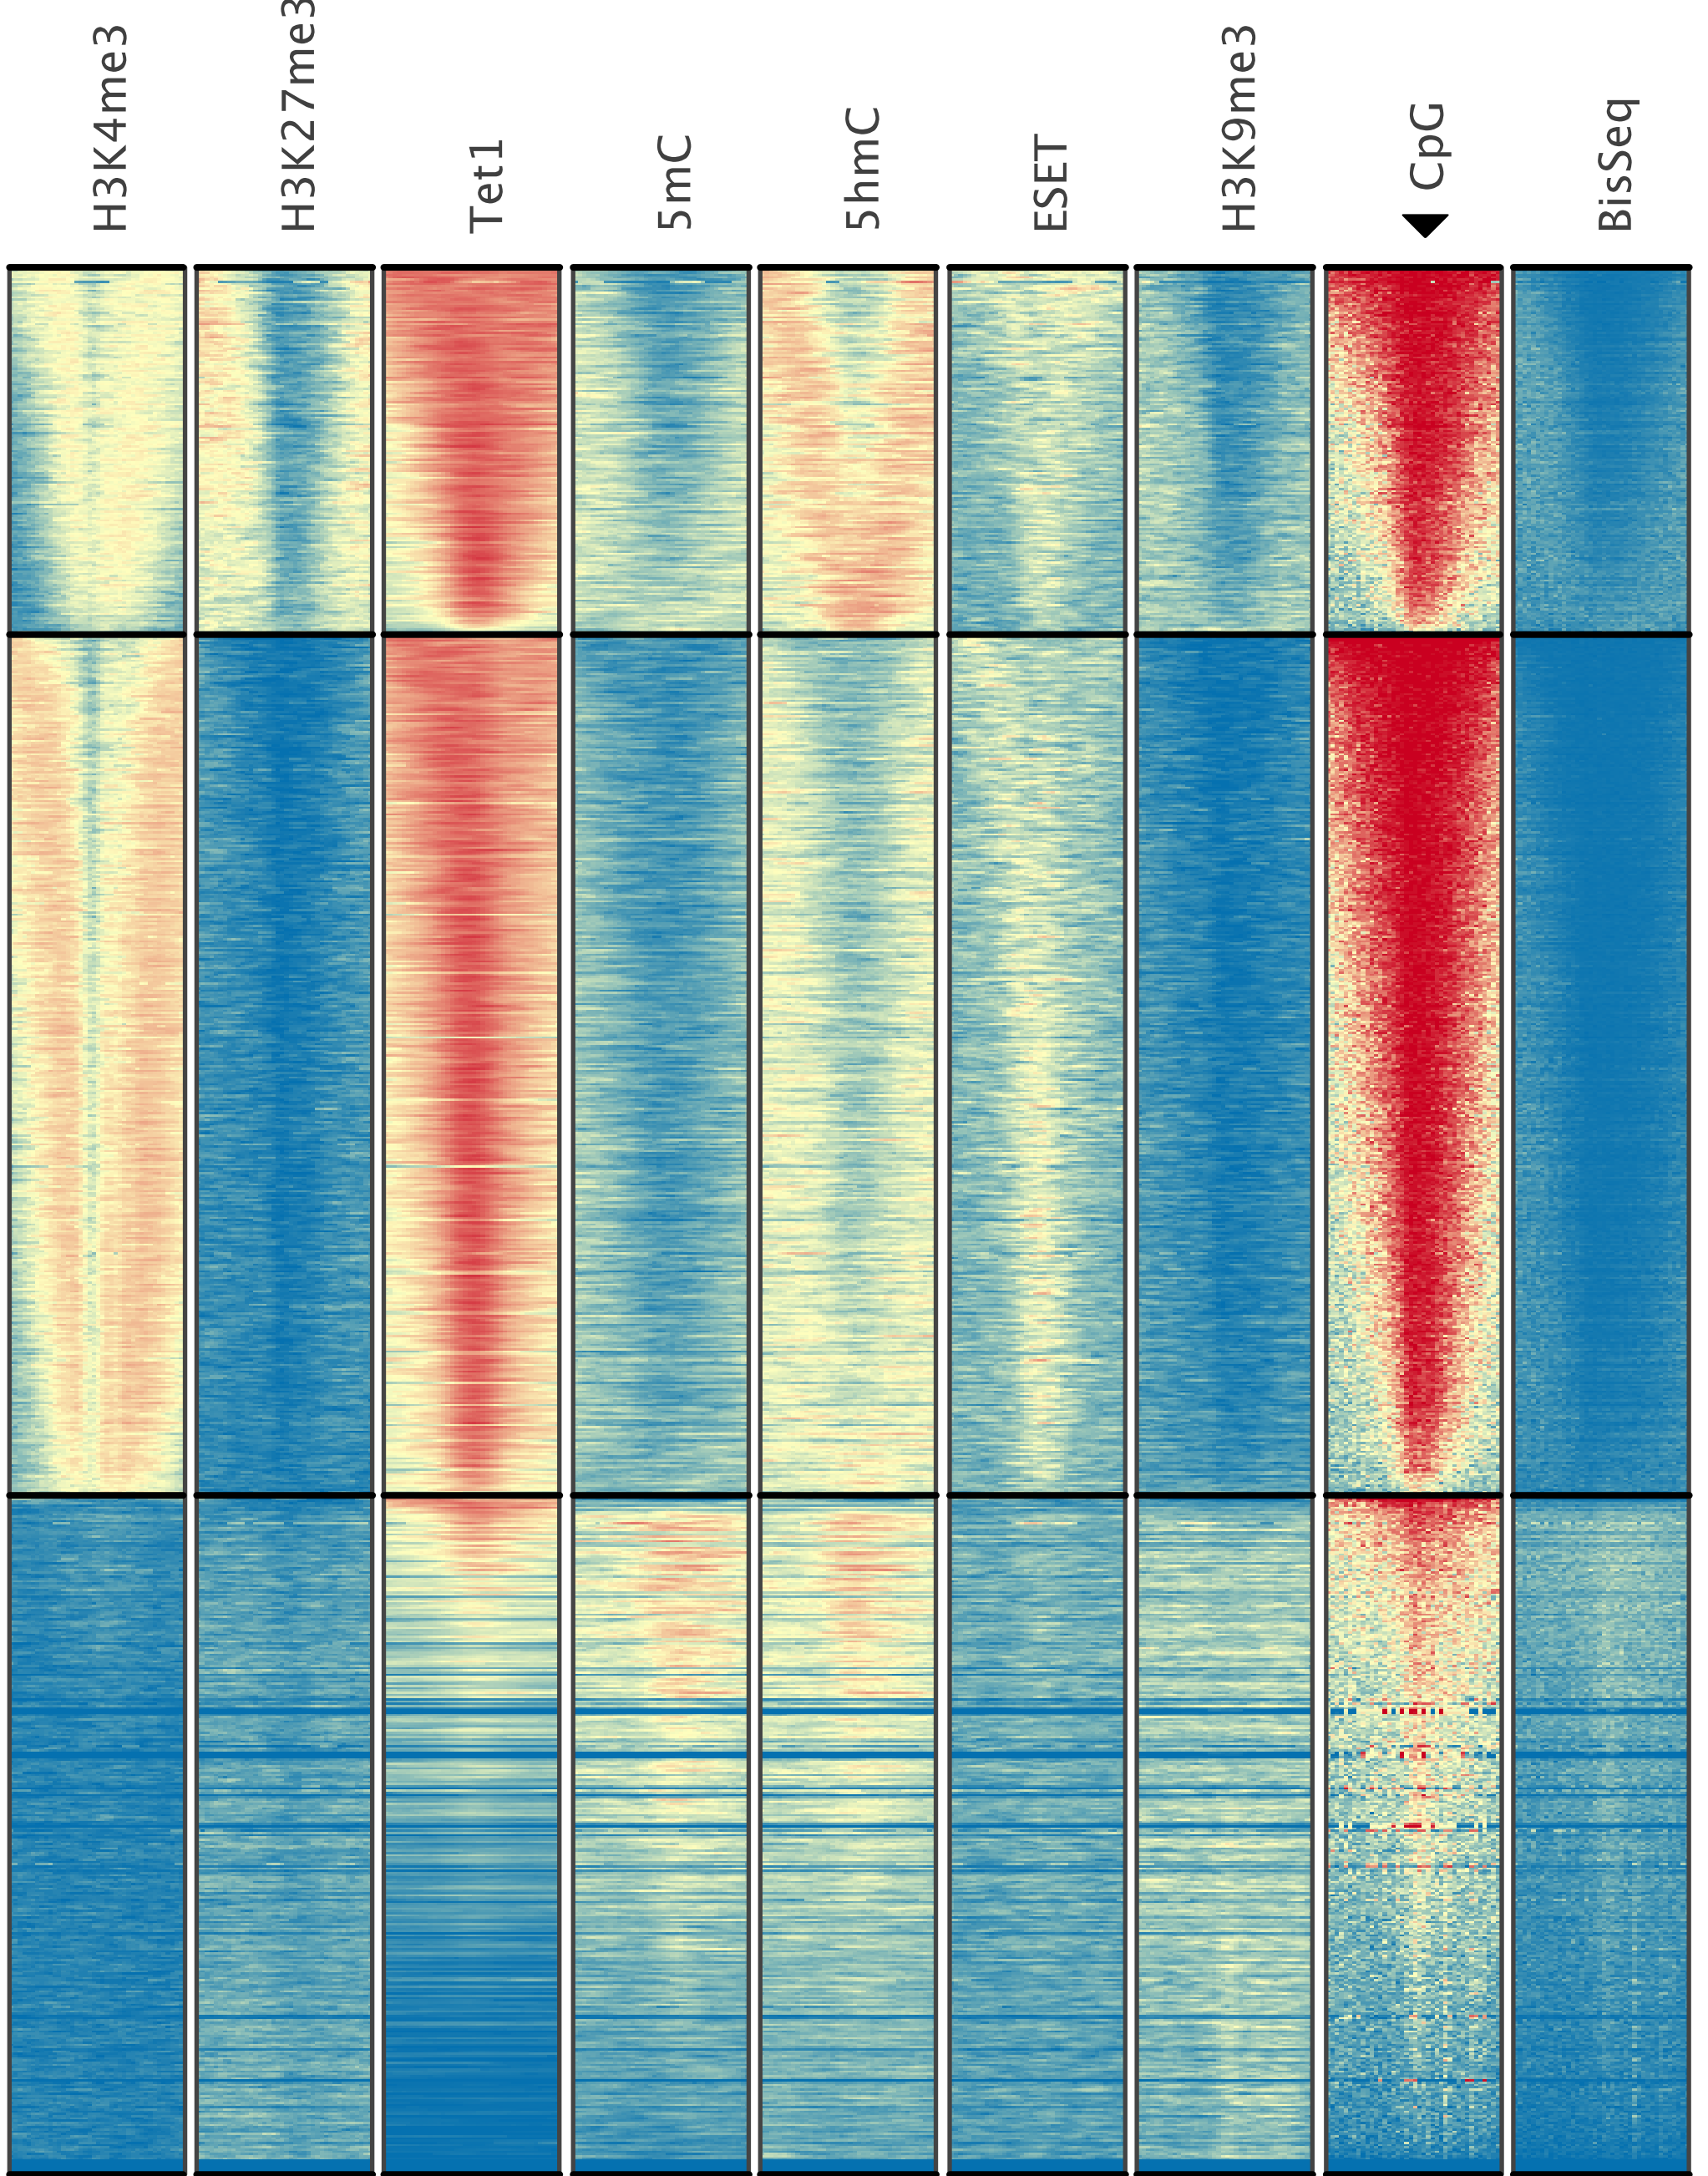

2000 bp / 40 bins

30985 total regions (36.2 per pixel row)  
sort: descending by SIGNAL\_AVERAGE

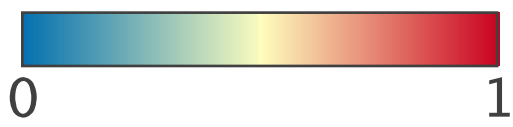

# Summary

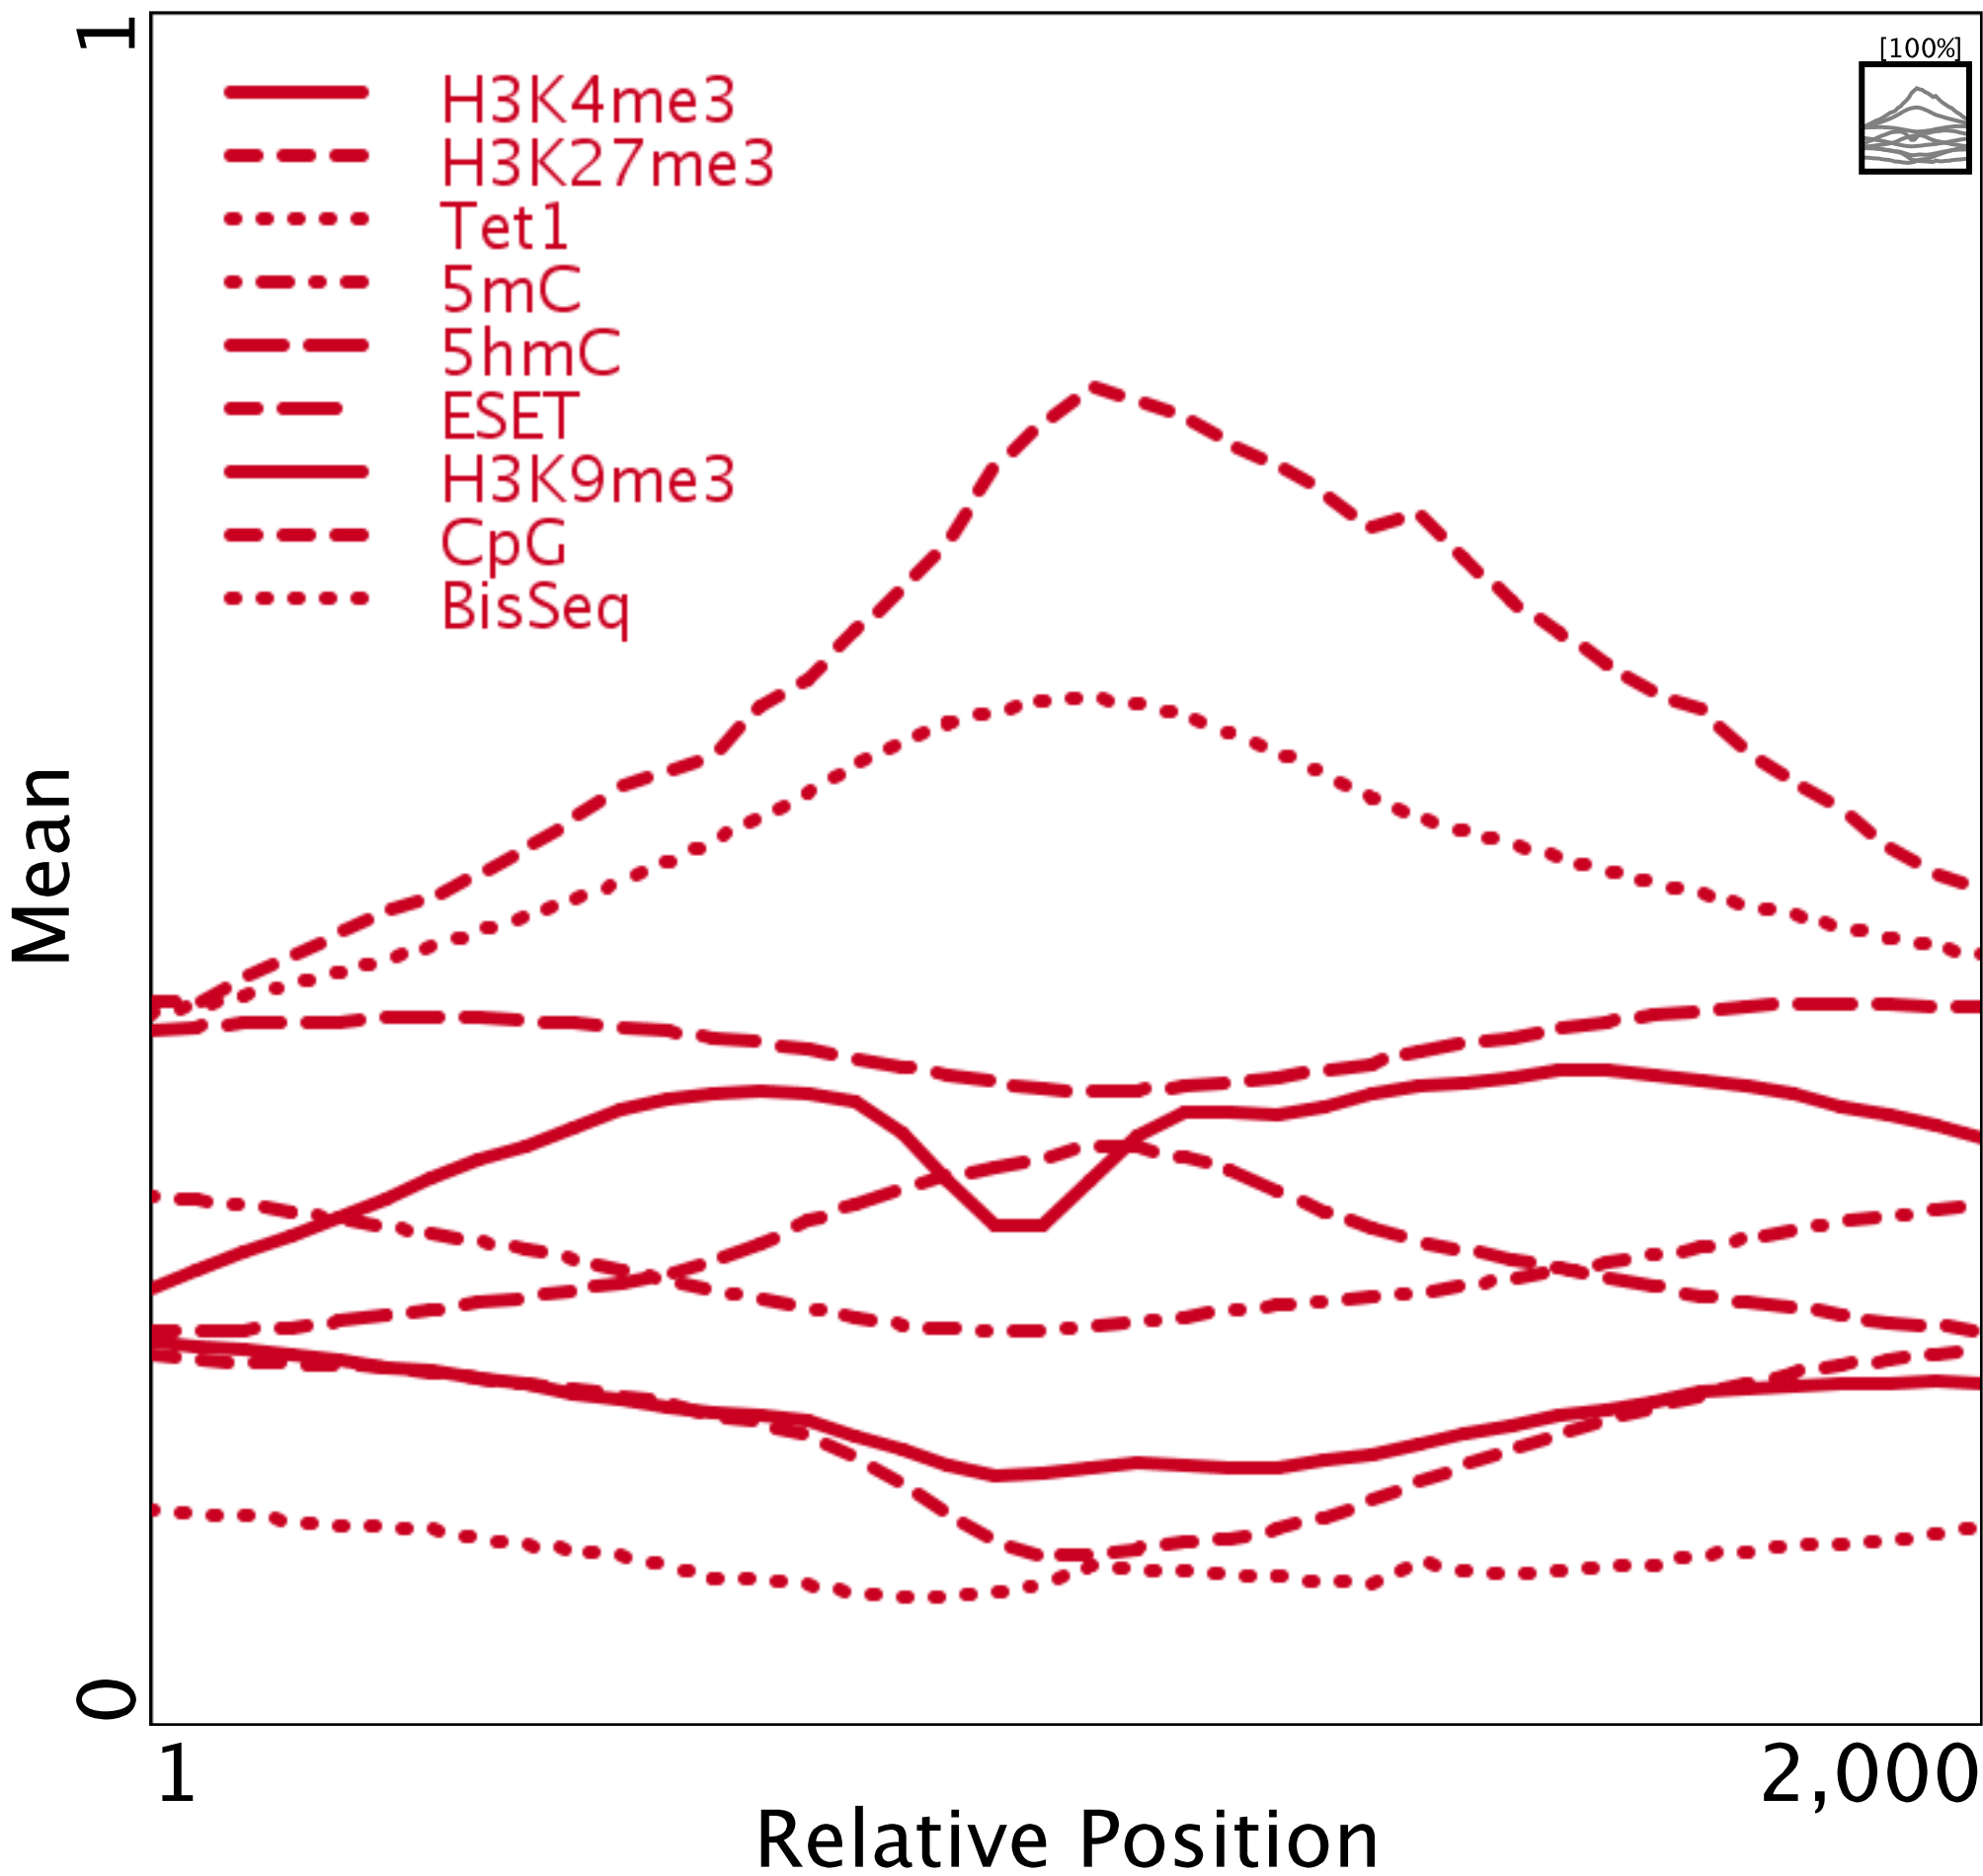

Supplement: supp_btw382_ChAsE_Bioinf_Supplementary.pdf [file supp_btw382_ChAsE_Bioinf_Supplementary.pdf]
